# Supplementary material for: Amino acid substitutions in a polygalacturonase inhibiting protein (OsPGIP2) increases sheath blight resistance in rice
Source: PubMed Central journal article supplement (PMC6663954; doi:10.1186/s12284-019-0318-6), 2019-07-29

Supplemental Fig. 1

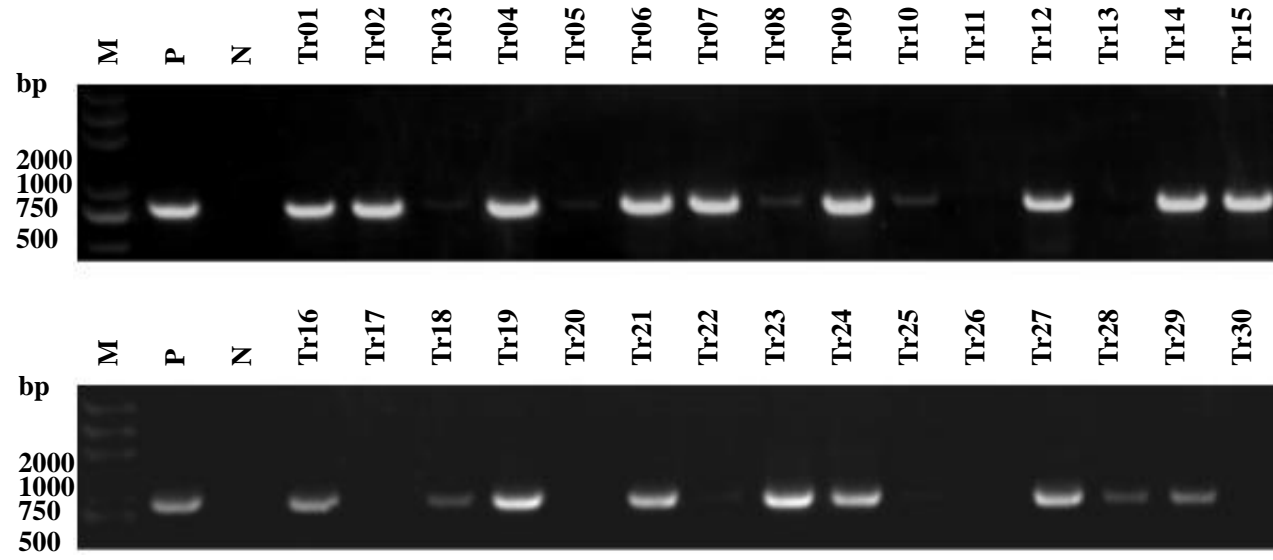

Supplement: 12284_2019_318_MOESM1_ESM.pdf [file 12284_2019_318_MOESM1_ESM.pdf]
